1 **GnRH pulse generator frequency is modulated by kisspeptin and GABA-glutamate**  
2 **interactions in the posterodorsal medial amygdala in female mice**

3 Lass G<sup>1</sup>, Li XF<sup>1</sup>, Wall E<sup>1,2</sup>, de Burgh RA<sup>1</sup>, Ivanova D<sup>1</sup>, McIntyre C<sup>1</sup>, Lin XH<sup>1</sup>, Colledge WH<sup>2</sup>,  
4 Lightman SL<sup>3</sup>, O'Byrne KT<sup>1</sup>.

5 <sup>1</sup>Department of Women and Children's Health, Faculty of Life Sciences and Medicine, King's  
6 College London, Guy's Campus, SE1 1UL, UK.

7 <sup>2</sup>Reproductive Physiology Group, Department of Physiology, Development and  
8 Neuroscience, University of Cambridge, Cambridge, CB2 3EG UK.

9 <sup>3</sup>Henry Wellcome Laboratories for Integrative Neuroscience and Endocrinology, The Dorothy  
10 Hodgkin Building, University of Bristol, Whitson Street, Bristol BS1 3NY, UK

11 Address and e-mail address to which correspondence and proofs should be sent: Professor  
12 Kevin O'Byrne, 2.92W Hodgkin Building, Department of Women and Children's Health,  
13 Faculty of Life Sciences and Medicine, Guy's Campus, King's College London, London, SE1  
14 1UL. kevin.o'byrne@kcl.ac.uk

15 Short title: MePD Kiss1, GABA and glutamate interactions increase LH pulse frequency

16 **Abstract**

17 Kisspeptin neurons in the arcuate nucleus of the hypothalamus generate GnRH pulses, and  
18 act as critical initiators of functional gonadotrophin secretion, and reproductive competency.  
19 However, kisspeptin in other brain regions, most notably the posterodorsal subnucleus of the  
20 medial amygdala (MePD), plays a significant modulatory role over the hypothalamic  
21 kisspeptin population; our recent studies using optogenetics have shown that low frequency  
22 light stimulation of MePD kisspeptin results in increased LH pulse frequency. Nonetheless,  
23 the neurochemical pathways that underpin this regulatory function remain unknown. To  
24 study this, we have utilised an optofluid technology, precisely combining optogenetic  
25 stimulation with pharmacological receptor antagonism, to investigate the neurotransmission  
26 involved in this circuitry. We have shown that functional neurotransmission of both GABA<sub>A</sub>  
27 and glutamate is a requirement for effective modulation of the GnRH pulse generator by  
28 amygdala kisspeptin neurons.

## 29 Introduction

30 Recent investigations have revealed a significant stimulatory role for kisspeptin in the  
31 posterodorsal subnucleus of the medial amygdala (MePD) in GnRH pulse generator  
32 modulation. Our previous optogenetic studies showed that sustained low-frequency blue  
33 light stimulation activated these neurons to increase LH pulse frequency, a proxy for GnRH  
34 pulse generator frequency (Lass *et al.*, 2020). This finding built upon our previous  
35 neuropharmacological approach using intra-MePD infusions of kisspeptin receptor (KISS1R)  
36 agonists and antagonists, which respectively increased LH secretion or decreased LH pulse  
37 frequency. (Comninou *et al.*, 2016). However, the mechanisms underlying this neuronal  
38 population's stimulatory role over pulsatile LH secretion have not been studied. Glutamate  
39 and GABA are the major stimulatory and inhibitory neurotransmitters in the mammalian  
40 brain, and many neuronal networks rely on the balance between these two to regulate their  
41 activity (Petroff, 2002). Therefore, these two neurotransmitters are sensible candidates to  
42 be used by the amygdala neuronal networks underlying the upstream, extra-hypothalamic  
43 regulation of the GnRH pulse generator. Unsurprisingly, both GABA and glutamate neurons  
44 are found in the MePD (Choi *et al.*, 2005; Westberry and Meredith, 2016), and  
45 pharmacological antagonism of both has deleterious effects on several aspects of  
46 reproductive physiology (Oberlander *et al.*, 2009; Polston *et al.*, 2001, Li *et al.*, 2015). In rats,  
47 blocking AMPA and NMDA glutamate receptors with CNQX and AP5, respectively, impedes  
48 activation of MePD neurons in response to vaginal-cervical stimulation, thereby preventing  
49 the pregnancy or pseudopregnancy response following intromission; AMPA antagonism also  
50 disrupts estrous cycles (Oberlander *et al.*, 2009; Polston *et al.*, 2001). Furthermore, MePD  
51 NMDA and GABA<sub>A</sub>R antagonism causes a weight-independent advancement of puberty (Li  
52 *et al.*, 2015). Thus, GABA and glutamate play an important role in the MePD in reproductive  
53 physiology.

54 The interesting dichotomy between the well-known suppressive role of the MePD in  
55 reproductive physiology, and the emerging activatory function of kisspeptin within this  
56 amygdaloid subnucleus, has led to a hypothesis that MePD kisspeptinergic activity may  
57 stimulate GABAergic interneurons within the MePD that in turn synapse with, and inhibit,  
58 GABAergic projection efferents from the MePD, resulting in an overall disinhibition of the  
59 latter. Evidence to support this hypothesis stems from the knowledge that there is a  
60 significant population of GABAergic neurons that project from the MePD to reproductive  
61 neural centres such as those in the hypothalamus (Choi *et al.*, 2005; Bian *et al.*, 2008), and  
62 inhibitory GABA interneurons, specifically, have also been detected in this subregion (Bian,  
63 2013; Keshavarzi *et al.*, 2014). This is in line with the fact that the MePD is a pallidal  
64 subnucleus, due to its embryological origins in the caudoventral medial ganglionic eminence,

65 indicating its similarity to other neural complexes which contain a classical GABA-GABA  
66 disinhibitory system (Pardo-Bellver *et al.*, 2012). Furthermore, other subnuclei of the  
67 amygdala, such as the basolateral amygdala and posteroventral medial amygdala, have  
68 been shown to exhibit functional glutamatergic signalling onto GABA interneurons (Polepalli  
69 *et al.*, 2010; Keshavarzi *et al.*, 2014; Sharp, 2017), supporting the hypothesis of an  
70 alternative glutamate-GABA-GABA pathway by which kisspeptin may activate the  
71 disinhibitory system.

72 It is therefore critical to investigate the GABAergic and glutamatergic signalling within the  
73 MePD with respect to kisspeptin and its action over GnRH pulse generator activity. To  
74 achieve this, a dual approach of simultaneously combining optogenetic activation and  
75 pharmacological antagonists was used via the implantation of an intra-MePD optofluid  
76 cannula. By optically stimulating the kisspeptin neurons in the presence or absence of  
77 glutamate or GABA antagonists during frequent blood sampling for measurement of LH  
78 pulses, it could be determined if either of these neurotransmitters are involved in the GnRH  
79 pulse generator modulating role of MePD kisspeptin.

## 80 **Materials and methods**

### 81 **Animals**

82 Breeding pairs of Kiss-Cre<sup>+/+</sup>:tdTomato<sup>+/+</sup> transgenic mice were obtained from the  
83 Department of Physiology Development and Neuroscience, University of Cambridge, UK;  
84 the Kiss-CRE mice carry a tdTomato transgene activated by CRE to label MePD Kiss1  
85 neurons. Litters from breeding pairs were genotyped using a multiplex polymerase chain  
86 reaction (PCR) protocol to detect heterozygosity for the Kiss-Cre or wild-type allele as  
87 previously described (Yeo *et al.*, 2016, Lass *et al.*, 2020). Adult female mice (19-23 g),  
88 heterozygous for the *Kiss-Cre* transgene were individually housed under controlled  
89 conditions (12:12 h light-dark cycle, lights on at 07:00 h, 25±1°C) with ad libitum access to  
90 food and water. All procedures were approved by the Animal Welfare and Ethical Review  
91 Body (AWERB) Committee at King's College London, in accordance with the United  
92 Kingdom Home Office Animals (Scientific Procedures) Act 1986.

### 93 **Stereotaxic injection of channelrhodopsin viral construct and implantation optofluid** 94 **cannula**

95 All surgical procedures were carried out under a combination of ketamine anaesthesia  
96 (Ketamidor, 100 mg/kg, i.p.; Chanelle Vet, Berkshire, UK) and xylazine (Rompun, 10 mg/kg,  
97 i.p.; Bayer, Leverkusen, Germany) under aseptic conditions. Mice were bilaterally

98 ovariectomised (OVX) to mitigate negative feedback of endogenous estrogen on LH  
99 secretion. Stereotaxic injection of the viral construct and implantation of the brain cannula  
100 was carried out concurrently with ovariectomy. Mice were placed in a Kopf motorised  
101 stereotaxic frame (Kopf, California, USA) and procedures were carried out using a robot  
102 stereotaxic system (Neurostar, Tübingen, Germany). Following an incision of the scalp, a  
103 small hole was drilled into the skull at a location above the MePD. The stereotaxic injection  
104 coordinates used to target the MePD were obtained from the mouse brain atlas of Paxinos  
105 and Franklin (Paxinos and Franklin, 2004) (2.1 mm lateral, 1.70 mm posterior to bregma and  
106 at a depth of 5.1 mm). Using a 2- $\mu$ L Hamilton micro-syringe (Esslab, Essex, UK) attached to  
107 the stereotaxic frame micro-manipulator, 0.4  $\mu$ l of the ChR2 virus, AAV9-EF1a-double  
108 floxed-hChR2(H134R)-EYFP-WPRE-HGHpA ( $\geq 1 \times 10^{13}$  vg/mL; Addgene, Massachusetts,  
109 USA) was injected unilaterally into the right MePD over 10 mins. The needle was left in  
110 position for a further 5 mins and then slowly withdrawn over 1 min. Following the injection of  
111 AAV, mice heterozygous for *Kiss-Cre* were implanted with a dual optofluid cannula (Doric  
112 Lenses, Quebec, Canada) at the same AP and ML coordinates as the virus injection site, but  
113 at a DV such that the internal cannula targets the MePD and the fibre optic cannula is  
114 situated 0.25 mm above. Dental cement (Superbond C&B kit Prestige Dental Products,  
115 Bradford UK) was used to fix the cannula in place and the skin incision was closed with a  
116 suture. Antibiotics were administered prophylactically post-surgery (Betamox, 0.15 mg/g,  
117 S.C; Norbrook Laboratories, Newry, Northern Ireland). Mice were left for 4 weeks preceding  
118 the experimental period to allow for effective opsin expression in target regions.

### 119 **Blood sampling procedure for LH measurement**

120 Following a 1-week recovery period from surgery, the mice were handled daily to acclimatise  
121 them to the tail-tip blood sampling procedure for measurement of LH (Lass *et al.*, 2020).  
122 The blood samples were processed by ELISA as reported previously (Lass *et al.*, 2020).  
123 Mouse LH standard and antibody were purchased from Harbour-UCLA (California, USA) and  
124 secondary antibody (NA934) was from VWR International (Leicestershire, UK). The intra-  
125 assay and inter-assay variations were 4.6% and 10.2%, respectively.

### 126 **In vivo optogenetic stimulation of MePD kisspeptin neurons and intra-MePD infusion 127 of bicuculline, CGP-35348 or CNQX + AP5**

128 On the day of the experiment, the zirconia ferrule of the implanted cannula was attached via  
129 a ceramic mating sleeve to a multimode fibre optic rotary joint patch cable (Thorlabs LTD,  
130 Ely, UK) at a length that allowed for free movement of the mice in their home cage. Blue  
131 light (473 nm wavelength; 5mW) was delivered using a Grass SD9B stimulator-controlled  
132 laser (Laserglow Technologies, Toronto, Canada). Following 1 h acclimatisation, blood

133 samples (4  $\mu$ l) were collected every 5 mins for 2.5 h. The first hour of blood collection  
134 consisted of no stimulation and in the subsequent 1.5 h, Kiss-Cre mice received optic  
135 stimulation at 5 Hz (Lass *et al.*, 2020).

136 For the neuropharmacological manipulation of GABA or glutamate receptor signalling with or  
137 without simultaneous optogenetic stimulation, mice were connected to the laser as described  
138 above, but additionally an injection cannula connected to extension tubing preloaded with  
139 drug solution was inserted into the guide cannula of the optofluid implant immediately after  
140 connection of the fibre optic cannula. Ten mins before optic stimulation, bolus administration  
141 of selective GABA<sub>A</sub>R (bicuculline; Sigma-Aldrich), GABA<sub>B</sub>R (CGP-35348; Sigma-Aldrich) or  
142 a cocktail of both NMDAR and AMPAR glutamate receptor (AP5; Tocris; CNQX; Tocris)  
143 antagonist dissolved in artificial cerebrospinal fluid (aCSF) commenced and continued over 5  
144 mins. The concentrations for the bicuculline, CGP-35348, AP5, and CNQX boli were 20  
145 pmol, 4.5 nmol, 1.2 nmol, and 0.5 nmol respectively. After 10 mins, immediately prior to the  
146 onset of optogenetic stimulation, continuous drug infusion commenced and continued for the  
147 remainder of the experiment (1.5 h). The total concentrations for the continuous infusion of  
148 bicuculline, CGP-35348, AP5, and CNQX were 68 pmol, 15 nmol, 2 nmol, and 1 nmol  
149 respectively. The same regimen was used in the absence of optic stimulation. As a control,  
150 Kiss-Cre mice received aCSF (0.3  $\mu$ l bolus, 1  $\mu$ l continuous) in the presence of 5 Hz optic  
151 stimulation following the same timeframe as the test experiments.

## 152 **Validation of AAV injection site**

153 Upon completion of experimental procedures, the mice were sacrificed with a lethal dose of  
154 ketamine and transcardially perfused with heparinised saline for 5 mins, followed by 10 mins  
155 of ice-cold 4 % paraformaldehyde in PBS (pH 7.4) for 15 mins using a pump (Minipuls,  
156 Gilson, Villiers Le Bel, France). Their brains were rapidly collected and post-fixed  
157 sequentially at 4 °C in 15% sucrose in 4% PFA and in 30% sucrose in 1 x PBS until they  
158 sank. Brains were then snap frozen on dry ice and stored at -80 °C until processing.  
159 Coronal brain slices (30  $\mu$ m thick) were sectioned using a cryostat (Bright Instrument, Luton,  
160 UK). Every third section was collected between -1.34 mm to -2.79 mm from the bregma.  
161 Sections were mounted on glass microscope slides, air-dried and cover-slipped with Prolong  
162 Antifade mounting medium (Molecular Probes, Inc, OR, USA). Only animals expressing  
163 EYFP fluorescent protein in the MePD were analysed by using Axioskop 2 Plus microscope  
164 equipped with Axiovision version 4.7 (Zeiss).

## 165 **Statistical analysis**

166 The Dynpeak algorithm was used to establish LH pulses (Vidal *et al.*, 2012). The effect of  
167 optogenetic stimulation and neuropharmacology studies was established by comparing the  
168 mean LH inter-pulse interval (IPI), from the 1 h pre stimulation or drug administration control  
169 period to the 1.5 h experimental period. On occasions where there were no LH pulses  
170 observed in the post treatment interval the IPI was given a value of 90 mins. LH pulse  
171 parameters were analysed by a two-way repeated measures ANOVA and subsequent Tukey  
172 post-hoc test. All statistics were performed using SigmaPlot (version 14). The threshold  
173 level for statistical significance was set at  $P < 0.05$  with data presented as mean  $\pm$  SEM.

## 174 **Results**

### 175 **Validation of AAV injection site and cannula position**

176 The AAV-ChR2 virus used to infect the cells in Kiss-Cre mice was tagged with fluorescent  
177 EYFP in order to be visualised under a microscope. The mean number of tdTomato-  
178 expressing kisspeptin cells in unilaterally-injected brain sections was  $24.50 \pm 5.20$   
179 (mean+SEM) per animal and  $20.33 \pm 4.50$  (~83%) of tdTomato-expressing neurons were  
180 EYFP fluorescence positive. Analysis of images acquired from coronal sectioning of the  
181 mouse brains showed that 7 out of 9 animals had successful stereotaxic injection of AAV-  
182 ChR2 virus into the MePD, and all 7 also had successful cannula implantation into the  
183 MePD. A representative example of a coronal brain section is shown in Figure 1. Dual  
184 fluorescent labelling revealed EYFP infection in tdTomato (*Kiss-Cre*-expressing neurons) cell  
185 bodies (Fig. 1G).

### 186 **Effects of sustained optical stimulation at 5 Hz, with and without a control 187 administration of aCSF, on LH pulse frequency**

188 After a 1 h control blood sampling period in the absence of optical stimulation, Kiss-Cre mice  
189 were stimulated at 5 Hz for 90 mins with and without administration of aCSF. In both  
190 experimental protocols, the stimulation resulted in a significant increase in LH pulse  
191 frequency (Fig. 2A and B). The mean inter-pulse interval (IPI) decreased from  $25.00 \pm 2.99$   
192 mins to  $18.60 \pm 2.07$  mins ( $n = 7$ ;  $p = 0.002$ ) after 5 Hz stimulation only, and from  $31.25 \pm$   
193  $1.25$  mins to  $22.73 \pm 1.94$  mins ( $n = 4$ ;  $p = 0.002$ ) after 5 Hz stimulation and infusion of aCSF  
194 (Fig.2C).

### 195 **Effects of bicuculline, a GABA<sub>A</sub>R antagonist, on LH pulse frequency in the presence 196 and absence of sustained 5 Hz optical stimulation**

197 In the second part of the experiment, Kiss-Cre mice received a unilateral intra-MePD  
198 infusion of bicuculline with and without sustained 5 Hz optical stimulation. After the dual



199 treatment of light and bicuculline, the average LH IPI significantly increased from  $27.00 \pm$   
200  $2.55$  mins to  $42.42 \pm$  to  $42.42 \pm 7.39$  mins ( $n = 5$ ;  $p = 0.008$ ), indicating reduced LH pulse  
201 frequency (Fig. 2D and F). There was no significant change in the IPIs before and after  
202 bicuculline administration alone, with a pre-infusion IPI of  $29.00 \pm 3.78$  mins and a post-  
203 infusion IPI of  $29.75 \pm 3.78$  mins ( $n = 5$ ;  $p = 0.771$ ) (Fig. 2E and F).

#### 204 **Effects of CGP, a GABA<sub>B</sub>R antagonist, on LH pulse frequency in the presence and** 205 **absence of sustained 5 Hz optic stimulation**

206 In the third part of the experiment, Kiss-Cre mice received a unilateral infusion of CGP-  
207 35348, an antagonist selective for the GABA<sub>B</sub>R, both with and without continuous  
208 optogenetic stimulation. There was no significant difference in LH IPI between the initial 60  
209 mins control period and subsequent period of intervention in either of these experimental  
210 protocols, however a trend towards increased LH pulse frequency during administration of  
211 CGP-35348 alone in the absence of light was observed (Fig. 2G-I). The pre- and post-  
212 intervention average IPIs for CGP-35348 with 5 Hz stimulation were  $30.80 \pm 4.67$  mins and  
213  $30.53 \pm 5.10$  mins, respectively ( $n = 5$ ;  $p = 0.954$ ). For CGP-35348 administration alone, the  
214 pre- and post-intervention average IPIs were  $26.67 \pm 2.28$  mins and  $21.25 \pm 0.72$  mins,  
215 respectively ( $n = 5$ ;  $p = 0.115$ ).

#### 216 **Effects of glutamate receptor antagonism on LH pulse frequency with and without** 217 **continuous 5 Hz optic stimulation**

218 The final protocol of the experiment involved unilateral infusion of a drug cocktail consisting  
219 of both AP5 and CNQX, antagonists for AMPA and NMDA receptors, respectively, in the  
220 presence and absence of light in Kiss-Cre mice (Fig. 2J-L). After the 60 mins control period,  
221 sustained 5 Hz optogenetic stimulation together with infusion of the antagonist resulted in a  
222 significantly decreased LH pulse frequency; indeed, in a number of cases LH pulsatility  
223 ceased altogether and the average IPI increased from  $27.33 \pm 1.89$  mins to  $69.50 \pm 10.26$   
224 mins ( $n = 6$ ;  $p = 0.007$ ). For AP5 and CNQX alone, there was a trend of increased IPI before  
225 and after treatment from  $23.04 \pm 3.24$  mins to  $38.59 \pm 15.73$  mins, however this was not  
226 significant ( $n = 4$ ;  $p = 0.253$ ).

#### 227 **Discussion**

228 The present study highlights for the first time a potential mechanism by which kisspeptin  
229 activity in the MePD is stimulatory over the hypothalamic GnRH pulse generator. Building  
230 upon previous findings that low-frequency (5 Hz) optogenetic stimulation of MePD *Kiss1*  
231 neurons increases the frequency of pulsatile LH secretion (Lass *et al.*, 2020), the results



232 presented in this study support the hypothesis that this is reliant upon the activity of both  
233 GABA and glutamate in the MePD.

234 It has been shown that the MePD, with its overwhelmingly GABAergic neuronal outputs, is a  
235 significant inhibitor of gonadotrophic hormone secretion and wider facets of reproductive  
236 physiology; its stimulation and lesioning delays and advances pubertal onset, respectively,  
237 and the MePD's activation during stress is deleterious on reproductive function and  
238 behaviour (Elwers and Critchlow, 1960; Bar-Sela and Critchlow, 1966; Lin *et al*, 2011).  
239 However, the recent findings that MePD *Kiss1* neurons stimulate the GnRH pulse generator  
240 raises the hypothesis for intranuclear GABA-GABA disinhibitory interactions, typical of limbic  
241 pallidal structures such as the MePD. The current study tested this utilising specific  
242 optogenetic activation of MePD kisspeptin neurons in conjunction with bicuculline and CGP-  
243 35348 – intra-MePD antagonists for GABA<sub>A</sub>R and GABA<sub>B</sub>R, respectively. Indeed, either of  
244 these drugs together with optic stimulation prevented the increase in LH pulse frequency  
245 seen with 5 Hz stimulation alone. The result of intra-MePD infusion of bicuculline together  
246 with 5 Hz optogenetic stimulation is a surprising one and poses an interesting question: how  
247 can intra-MePD GABA<sub>A</sub>R antagonism not only prevent the stimulatory effects of optogenetic  
248 stimulation, but in fact cause the opposite result of significantly reducing the activity of the  
249 GnRH pulse generator, while bicuculline alone had no effect on LH pulse frequency? We  
250 suggest a neuronal circuit, involving glutamatergic synaptic mechanisms, that may underly  
251 this phenomenon (Figure 3). Indeed, a stimulatory effect of the MePD kisspeptinergic  
252 system over the GnRH pulse generator has been linked to glutamatergic activation; the  
253 pubertal transition is tightly correlated with a developmental increase in the expression of  
254 both kisspeptin (Stephens *et al.*, 2016) and glutamate (Cooke, 2011) in the MePD, and 29%  
255 of MePD *Kiss1* neurons in adult male mice coexpress vesicular glutamate transporter 2  
256 (VGlut2) mRNA (Aggarwal *et al.*, 2019); indeed, the use of glutamate as a neurotransmitter  
257 by *Kiss1* neurons has been found for the KNDy population (Voliotis *et al.*, 2021) including  
258 their regulation of *Kiss1* neurons in the AVPV (Qiu *et al.*, 2018). The present finding of an  
259 almost-complete ablation of pulsatile LH secretion following MePD kisspeptin activation  
260 combined with infusion of intranuclear glutamate antagonists provides further support to  
261 MePD kisspeptin effect's dependence on glutamate. Therefore, the following mechanism is  
262 proposed: optical stimulation of MePD kisspeptin in the presence of GABA<sub>A</sub>R antagonists  
263 decreases LH pulse frequency by glutamatergically activating the hypothetical GABAergic  
264 projections from the MePD to KNDy neurons; whether this occurs via glutamate secretion  
265 from MePD kisspeptin cells themselves is unknown. In other words, cancelling the ability of  
266 GABA interneurons to take part in the disinhibition during optical stimulation shifts the  
267 balance from a stimulatory to inhibitory output from the MePD.

268 The fact that GABA<sub>A</sub>R antagonism alone failed to cause any change in LH pulse frequency  
269 is an important factor in our model: it is possible that under basal conditions MePD  
270 kisspeptin neurons are relatively quiescent, and therefore solely pharmacologically blocking  
271 the inputs to the GABAergic MePD projections without a corresponding increase in  
272 glutamatergic activity would make little change to the net influence of the MePD over the  
273 KNDy system. Although silent kisspeptin signalling under basal conditions supports the  
274 current hypothesised model, it contradicts neuropharmacology studies that show  
275 antagonising endogenous kisspeptin within the MePD causes a robust decrease in LH pulse  
276 frequency (Comninou *et al.*, 2016). However, this latter study used OVX rats that were  
277 supplemented with 17  $\beta$ -estradiol to mimic the hormonal profile in the diestrus phase of the  
278 estrous cycle. It is important to note, the present study used OVX mice which were not  
279 supplemented with 17  $\beta$ -estradiol. *Kiss1* expression within the MePD varies in relation to the  
280 estrous cycle with low expression observed in OVX mice; estradiol treatment, however,  
281 amplified *Kiss1* expression in this brain region (Kim *et al.*, 2011). This may explain why  
282 under basal conditions the MePD kisspeptin system appears reduced in our OVX mouse  
283 model.

284 Therefore, the proposed model does well to explain why GABA<sub>A</sub>R antagonism in the  
285 presence of MePD *Kiss1* optical stimulation reduces LH pulse frequency. However, a  
286 possible explanation as to why optogenetically stimulating these neurons in the presence of  
287 intra-MePD glutamate antagonists essentially stops all GnRH pulse generator activity is  
288 more complex. Complying with the model would suggest that blocking glutamate activity,  
289 while activating the GABA-GABA disinhibitory system, would in fact increase LH pulse  
290 frequency rather than prohibiting it altogether. Nevertheless, we provide a potential  
291 explanation for this phenomenon. By examining all of the individual pulse profiles more  
292 closely, a subtle, but potentially crucial aspect is identified. In over 80% (5 out of 6) of tests  
293 in which glutamate antagonists were infused in conjunction with optical stimulation, a pulse  
294 of LH was detected precisely 10 mins after the bolus infusion, and immediately *before* the  
295 onset of light stimulation. Only once the optic laser was switched on did the detection of LH  
296 pulses reliably cease. Therefore, it is reasonable to posit that while this protocol indeed  
297 blocked GnRH pulse generator activity, this occurs via a mechanism of potential over-  
298 stimulation which sends the KNDy system into a state of inertia as it is unable to respond.  
299 The proposed hypothesis is that activation of MePD kisspeptin drives i) the disinhibitory  
300 GABA-GABA pathway from the MePD, ii) glutamatergic interneurons that in turn project to  
301 the GABA-GABA pathway, and iii) glutamatergic projections from the MePD onto the ARC (a  
302 schematic diagram describing this is shown in Figure 3A). Thus, optogenetic stimulation of  
303 the MePD *Kiss1* neurons combined with antagonism of MePD glutamate results in the net

304 effect of heightened activation of the GnRH pulse generator and resultant inertia (Figure 3B).  
305 The proposal of excessive GnRH pulse generator neuronal activity resulting in depolarisation  
306 silencing is in line with recent findings from our research group. Using mathematical models  
307 confirmed with *in vivo* optogenetics, it is now known that the ultradian oscillation of the  
308 hypothalamic KNDy network works on a bifurcation system that is eventually terminated as  
309 an upper threshold of basal neuronal activity is reached (Voliotis *et al.*, 2019); we have  
310 described in detail how stimulation of the KNDy network increases in network excitability  
311 (e.g. via glutamatergic activity) or neurokinin B (NKB) signalling results in a robust transition  
312 from a pulsatile to a quiescent dynamic state of the GnRH pulse generator (Voliotis *et al.*,  
313 2021). Furthermore, unpublished work conducted by O'Byrne using ovariectomised  
314 primates showed that administration of NMDA, a potent neuronal activator, evoked an MUA  
315 volley, the electrophysiological correlate of GnRH pulse generator activity (O'Byrne and  
316 Knobil, 1993) and corresponding LH pulse, followed by neuronal silence and cessation of LH  
317 pulses. Thus, the GnRH pulse generator is highly sensitive to incoming stimuli and may be  
318 prone to silencing by excessive activation. Importantly, glutamate antagonism alone did not  
319 result in a significant decrease in LH pulse frequency, and this is in line with the  
320 abovementioned theory of basal quiescence of the MePD kisspeptin system.

321 The present study also investigated the role of GABA<sub>B</sub> signalling in the activity of MePD  
322 kisspeptin and the GnRH pulse generator using CGP-35348, a GABA<sub>B</sub>R selective  
323 antagonist. In contrast to the significant reduction in LH pulse frequency observed with  
324 bicuculline and optic stimulation, the interference of GABA<sub>B</sub>R signalling in conjunction with  
325 optogenetics only went so far as to prevent the increase in LH pulsatility, indicating a  
326 present, yet smaller, influence. The reason for this difference remains unclear, but can be  
327 potentially explained by the pharmacological differences between GABA<sub>A</sub> and GABA<sub>B</sub>  
328 receptors, with the former accounting for fast inhibition while the latter is responsible for slow  
329 inhibition (Nicoll *et al.*, 1990). Moreover, it has been shown that in the case of LH release,  
330 only ICV activation of the GABA<sub>A</sub>R, and not GABA<sub>B</sub>R, both reduced LH release from the  
331 pituitary and GnRH levels in the POA (Leonhardt *et al.*, 1995), suggesting a differential role  
332 for the two receptor subtypes in reproductive neuroendocrinology. Moreover, while it has  
333 been shown that knockout of the GABA<sub>B</sub>R subtype in adult female mice results in subfertile  
334 phenotypes such as decreased hypothalamic levels of GnRH and GnRH mRNA, it has no  
335 diminishing effects on LH or FSH levels, or *Kiss1* expression in the hypothalamus (Catalano  
336 *et al.*, 2005; Catalano *et al.*, 2010; di Giorgio *et al.*, 2014); *Kiss1* levels in the MePD,  
337 however, are increased. This limited effect is in line with the present finding showing only  
338 partial consequences of MePD GABA<sub>B</sub>R antagonism together with kisspeptin optic  
339 stimulation.

340 These data have demonstrated, for the first time, the possible neuronal mechanisms by  
341 which increased kisspeptinergic activity within the amygdala increases GnRH pulse  
342 frequency, which could also provide the basis for the sexual development of puberty. It  
343 would be of interest to further investigate the roles of GABA and glutamate in this network,  
344 including in relation to perturbations of reproductive physiology associated with the  
345 amygdala such as stress and abnormal food intake.

#### 346 **Acknowledgements**

347 We are extremely grateful for all the help and advice on optogenetics provided by Dr. Matt  
348 Grubb, Centre for Developmental Neurobiology, Faculty of Life Sciences and Medicine,  
349 King's College London, UK. The authors gratefully acknowledge the financial support from  
350 the MRC (MR/N022637/1) and BBSRC (BB/S000550/1). GL and DI are funded by MRC  
351 PhD studentships.

#### 352 **References**

- 353 AGGARWAL, S., TANG, C., SING, K., KIM, H. W., MILLAR, R. P. & TELLO, J. A. 2019.  
354 Medial Amygdala Kiss1 Neurons Mediate Female Pheromone Stimulation of Luteinizing  
355 Hormone in Male Mice. *Neuroendocrinology*, 108, 172-189.
- 356 BAR-SELA, M. & CRITCHLOW, V. 1966. Delayed puberty following electrical stimulation of  
357 amygdala in female rats. *Am J Physiol*, 211, 1103-7.
- 358 BIAN, X. 2013. Physiological and morphological characterization of GABAergic neurons in  
359 the medial amygdala. *Brain Res*, 1509, 8-19.
- 360 BIAN, X., YANAGAWA, Y., CHEN, W. R. & LUO, M. 2008. Cortical-like functional  
361 organization of the pheromone-processing circuits in the medial amygdala. *J Neurophysiol*,  
362 99, 77-86.
- 363 CATALANO, P. N., BONAVENTURA, M. M., SILVEYRA, P., BETTLER, B., LIBERTUN, C. &  
364 LUX-LANTOS, V. A. 2005. GABA(B1) knockout mice reveal alterations in prolactin levels,  
365 gonadotropic axis, and reproductive function. *Neuroendocrinology*, 82, 294-305.

- 366 CATALANO, P. N., DI GIORGIO, N., BONAVENTURA, M. M., BETTLER, B., LIBERTUN, C.  
367 & LUX-LANTOS, V. A. 2010. Lack of functional GABA(B) receptors alters GnRH physiology  
368 and sexual dimorphic expression of GnRH and GAD-67 in the brain. *Am J Physiol*  
369 *Endocrinol Metab*, 298, E683-96.
- 370 CHOI, G. B., DONG, H. W., MURPHY, A. J., VALENZUELA, D. M., YANCOPOULOS, G. D.,  
371 SWANSON, L. W. & ANDERSON, D. J. 2005. Lhx6 delineates a pathway mediating innate  
372 reproductive behaviors from the amygdala to the hypothalamus. *Neuron*, 46, 647-60.
- 373 COMNINOS, A. N., ANASTASOVSKA, J., SAHURI-ARISOYLU, M., LI, X., LI, S., HU, M.,  
374 JAYASENA, C. N., GHATEI, M. A., BLOOM, S. R., MATTHEWS, P. M., O'BYRNE, K. T.,  
375 BELL, J. D. & DHILLO, W. S. 2016. Kisspeptin signaling in the amygdala modulates  
376 reproductive hormone secretion. *Brain Struct Funct*, 221, 2035-47.
- 377 COOKE, B. M. 2011. Synaptic reorganisation of the medial amygdala during puberty. *J*  
378 *Neuroendocrinol*, 23, 65-73.
- 379 DI GIORGIO, N. P., SEMAAN, S. J., KIM, J., LOPEZ, P. V., BETTLER, B., LIBERTUN, C.,  
380 LUX-LANTOS, V. A. & KAUFFMAN, A. S. 2014. Impaired GABAB receptor signaling  
381 dramatically up-regulates Kiss1 expression selectively in nonhypothalamic brain regions of  
382 adult but not prepubertal mice. *Endocrinology*, 155, 1033-44.
- 383 ELWERS, M. & CRITCHLOW, V. 1960. Precocious ovarian stimulation following  
384 hypothalamic and amygdaloid lesions in rats. *Am J Physiol*, 198, 381-5.
- 385 KESHAVARZI, S., SULLIVAN, R. K., IANNO, D. J. & SAH, P. 2014. Functional properties  
386 and projections of neurons in the medial amygdala. *J Neurosci*, 34, 8699-715.
- 387 KIM, J., SEMAAN, S. J., CLIFTON, D. K., STEINER, R. A., DHAMIJA, S. & KAUFFMAN, A.  
388 S. 2011. Regulation of Kiss1 expression by sex steroids in the amygdala of the rat and  
389 mouse. *Endocrinology*, 152, 2020-30.
- 390 LASS, G., LI, X. F., DE BURGH, R. A., HE, W., KANG, Y., HWA-YEO, S., SINNETT-SMITH,  
391 L. C., MANCHISHI, S. M., COLLEDGE, W. H., LIGHTMAN, S. L. & O'BYRNE, K. T. 2020.

392 Optogenetic stimulation of kisspeptin neurons within the posterodorsal medial amygdala  
393 increases luteinising hormone pulse frequency in female mice. *J Neuroendocrinol*, 32,  
394 e12823.

395 LEONHARDT, S., SEONG, J. Y., KIM, K., THORUN, Y., WUTTKE, W. & JARRY, H. 1995.  
396 Activation of central GABAA-but not of GABAB-receptors rapidly reduces pituitary LH  
397 release and GnRH gene expression in the preoptic/anterior hypothalamic area of  
398 ovariectomized rats. *Neuroendocrinology*, 61, 655-62.

399 LI, X. F., HU, M. H., HANLEY, B. P., LIN, Y. S., POSTON, L., LIGHTMAN, S. L. & O'BYRNE,  
400 K. T. 2015. The Posterodorsal Medial Amygdala Regulates the Timing of Puberty Onset in  
401 Female Rats. *Endocrinology*, 156, 3725-36.

402 LIN, Y., LI, X., LUPI, M., KINSEY-JONES, J. S., SHAO, B., LIGHTMAN, S. L. & O'BYRNE,  
403 K. T. 2011. The role of the medial and central amygdala in stress-induced suppression of  
404 pulsatile LH secretion in female rats. *Endocrinology*, 152, 545-55.

405 NICOLL, R. A., MALENKA, R. C. & KAUER, J. A. 1990. Functional comparison of  
406 neurotransmitter receptor subtypes in mammalian central nervous system. *Physiol Rev*, 70,  
407 513-65.

408 O'BYRNE, K. T. & KNOBIL, E. 1993. Electrophysiological approaches to gonadotrophin  
409 releasing hormone pulse generator activity in the rhesus monkey. *Hum Reprod*, 8 Suppl 2,  
410 37-40.

411 OBERLANDER, J. G., LIN, A. W., MAN, H. Y. & ERSKINE, M. S. 2009. AMPA receptors in  
412 the medial amygdala are critical for establishing a neuroendocrine memory in the female rat.  
413 *Eur J Neurosci*, 29, 146-60.

414 PARDO-BELLVER, C., CADIZ-MORETTI, B., NOVEJARQUE, A., MARTINEZ-GARCIA, F. &  
415 LANUZA, E. 2012. Differential efferent projections of the anterior, posteroventral, and  
416 posterodorsal subdivisions of the medial amygdala in mice. *Front Neuroanat*, 6, 33.

- 417 PAXINOS, G. & FRANKLIN, K. 2004. *The Mouse Brain in Stereotaxic Coordinates*, Boston,  
418 MA, Elsevier Academic Press.
- 419 PETROFF, O. A. 2002. GABA and glutamate in the human brain. *Neuroscientist*, 8, 562-73.
- 420 POLEPALLI, J. S., SULLIVAN, R. K., YANAGAWA, Y. & SAH, P. 2010. A specific class of  
421 interneuron mediates inhibitory plasticity in the lateral amygdala. *J Neurosci*, 30, 14619-29.
- 422 POLSTON, E. K., HEITZ, M., BARNES, W., CARDAMONE, K. & ERSKINE, M. S. 2001.  
423 NMDA-mediated activation of the medial amygdala initiates a downstream neuroendocrine  
424 memory responsible for pseudopregnancy in the female rat. *J Neurosci*, 21, 4104-10.
- 425 QIU, J., RIVERA, H. M., BOSCH, M. A., PADILLA, S. L., STINCIC, T. L., PALMITER, R. D.,  
426 KELLY, M. J. & RONNEKLEIV, O. K. 2018. Estrogenic-dependent glutamatergic  
427 neurotransmission from kisspeptin neurons governs feeding circuits in females. *Elife*, 7.
- 428 SHARP, B. M. 2017. Basolateral amygdala and stress-induced hyperexcitability affect  
429 motivated behaviors and addiction. *Transl Psychiatry*, 7, e1194.
- 430 STEPHENS, S. B., CHAHAL, N., MUNAGANURU, N., PARRA, R. A. & KAUFFMAN, A. S.  
431 2016. Estrogen Stimulation of Kiss1 Expression in the Medial Amygdala Involves Estrogen  
432 Receptor-alpha But Not Estrogen Receptor-beta. *Endocrinology*, 157, 4021-4031.
- 433 VIDAL, A., ZHANG, Q., MEDIGUE, C., FABRE, S. & CLEMENT, F. 2012. DynPeak: an  
434 algorithm for pulse detection and frequency analysis in hormonal time series. *PLoS One*, 7,  
435 e39001.
- 436 VOLIOTIS, M., LI, X. F., DE BURGH, R., LASS, G., LIGHTMAN, S. L., O'BYRNE, K. T. &  
437 TSANEVA-ATANASOVA, K. 2019. The Origin of GnRH Pulse Generation: An Integrative  
438 Mathematical-Experimental Approach. *J Neurosci*, 39, 9738-9747.
- 439 VOLIOTIS, M., Li, X. F., DE BURGH, R.A., LASS, G., IVANOVA, D., MCINTYRE, C.,  
440 O'BYRNE, K. T. & TSANEVA-ATANASOVA, K. 2021. Modulation of pulsatile GnRH



441 dynamics across the ovarian cycle; the role of glutamatergic transmission in the arcuate  
442 kisspeptin network. biorXiv. 2021.03.22.436428:1-21

443 WESTBERRY, J. M. & MEREDITH, M. 2016. GABAergic mechanisms contributing to  
444 categorical amygdala responses to chemosensory signals. *Neuroscience*, 331, 186-96.

445 YEO, S. H., KYLE, V., MORRIS, P. G., JACKMAN, S., SINNETT-SMITH, L. C.,  
446 SCHACKER, M., CHEN, C. & COLLEDGE, W. H. 2016. Visualisation of Kiss1 Neurone  
447 Distribution Using a Kiss1-CRE Transgenic Mouse. *J Neuroendocrinol*, 28.

448 **Data Availability Statement:** All data contained within the manuscript have been deposited  
449 in the King's Research Data Management System and are freely available to public access  
450 ([www.kcl.ac.uk/library/researchsupport/research-data-management/preserve/deposit-your-](http://www.kcl.ac.uk/library/researchsupport/research-data-management/preserve/deposit-your-data-with-kings3)  
451 [data-with-kings3](http://www.kcl.ac.uk/library/researchsupport/research-data-management/preserve/deposit-your-data-with-kings3)).

**FIGURE 1. Expression of Chr2-EYFP in MePD kisspeptin neurones in Kiss-Cre mice.**

(A), shows a schematic representation of the MePD and its spatial relationship with the optic tract (OT). (B), shows tdTomato-expressing kisspeptin neurones, while (C) shows those cells infected with EYFP. Coronal section showing green EYFP fluorescence positive neurones in the MePD (D). (E-G), show a higher-power magnification of the area in (B-D) encased with the yellow dotted line, showing fluorescence of tdTomato (red cells), EYFP (green cells), and both (yellow cells), respectively. MePD kisspeptin neurones tagged with EYFP (labelled with yellow arrows) and not tagged with EYFP (red arrows) are shown in (G).

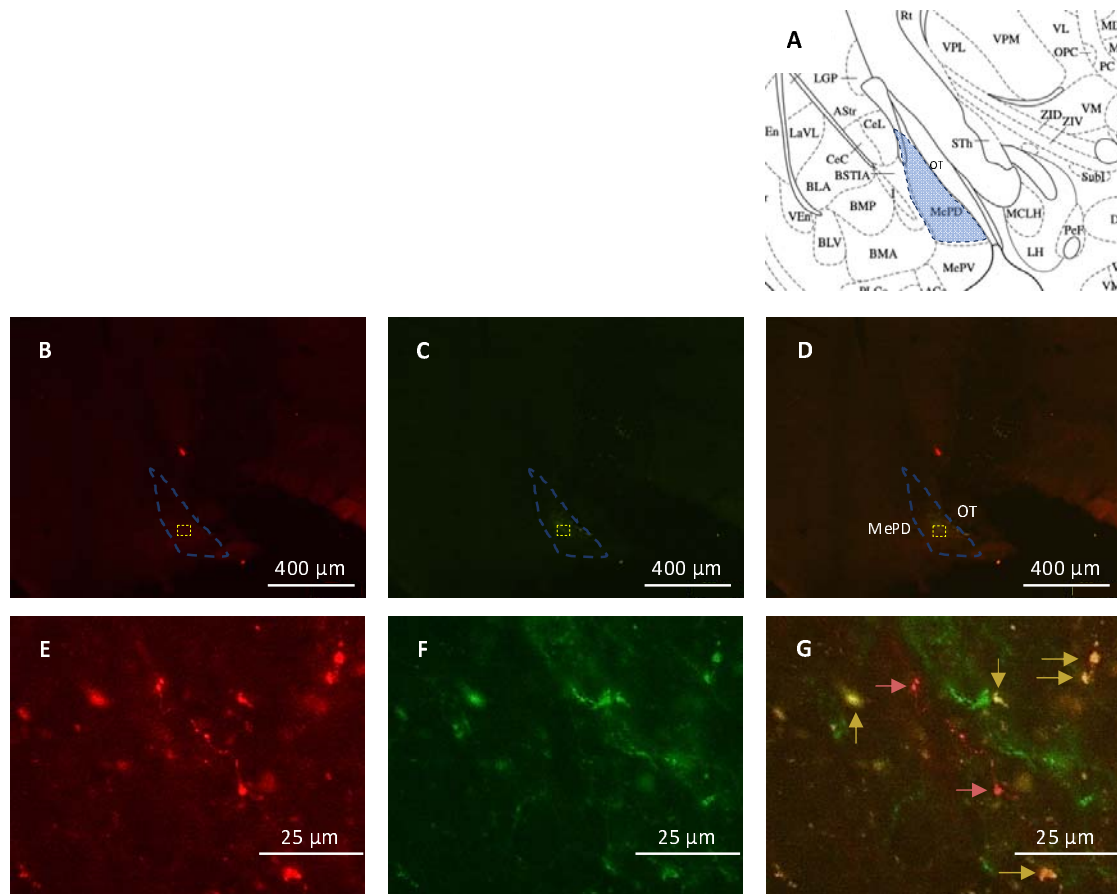



## FIGURE 2. Effect of GABA and glutamate receptor antagonism with and without sustained optogenetic stimulation of MePD Kiss1 neurones on LH pulse frequency.

Representative examples showing the effects of 5 Hz stimulation (A), 5 Hz + aCSF (B), bicuculline + 5 Hz (D), CGP-35348 + 5 Hz (G), AP5 + CNQX + 5 Hz (J) on pulsatile LH secretion in ovariectomised mice. Representative examples for the effects of drugs alone – bicuculline (E), CGP (H), AP5 + CNQX (K) – are also shown. Histograms showing the mean LH interpulse interval for all interventions are also provided (C, F, I, L). Sustained stimulation at 5 Hz in the presence (n = 4) and absence (n = 7) of aCSF infusion resulted in a significant reduction in the LH interpulse interval (p < 0.05). Sustained stimulation together with bicuculline (n = 5) and AP5 + CNQX (n = 6) resulted in a significant increase in LH interpulse interval. Wild type control animals did not respond to stimulation. LH pulses detected by the DynPeak algorithm are indicated with an asterisk. Bolus injections are indicated by downward black arrows. #P < 0.05 vs control. Results represent the mean ± SEM.

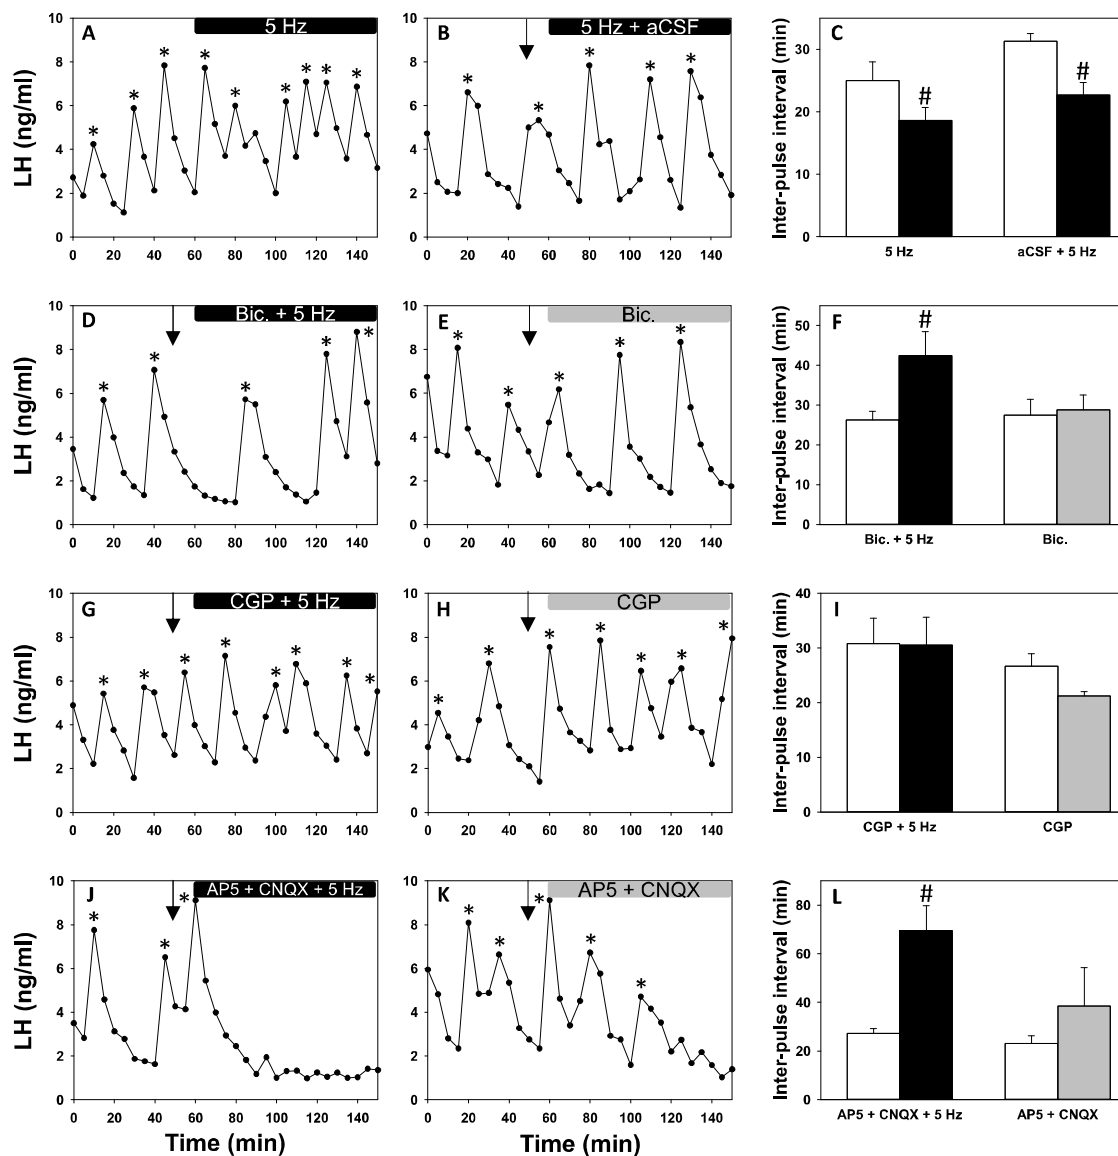

**FIGURE 3. Model showing the proposed interactions and pathways involved in the MePD regulation over the hypothalamic GnRH pulse generator (ARC<sup>KNDy</sup>).** (A) According to the hypothesis model, kisspeptin in the MePD regulates the GnRH pulse generator by activating two pathways: i) a GABA-GABA disinhibitory pathway and ii) a pathway involving glutamatergic MePD projection neurones. (B) Optogenetic stimulation of MePD *Kiss1* (a) results in activation of the GABA-GABA disinhibitory pathway (b) that leads to a reduction in GABAergic tone arising from the MePD (c), as well as amplification of the MePD glutamatergic tone (d); it also causes activation of glutamatergic interneurons that project to the GABAergic efferent neurones, counteracting the stimulatory output of the MePD (e). Antagonism of these glutamatergic interneurons, combined with the optic stimulation of MePD *Kiss1*, results in the net effect of over-stimulation of the ARC KNDy network resulting in a transition from a pulsatile to a quiescent dynamic state of the GnRH pulse generator.

A

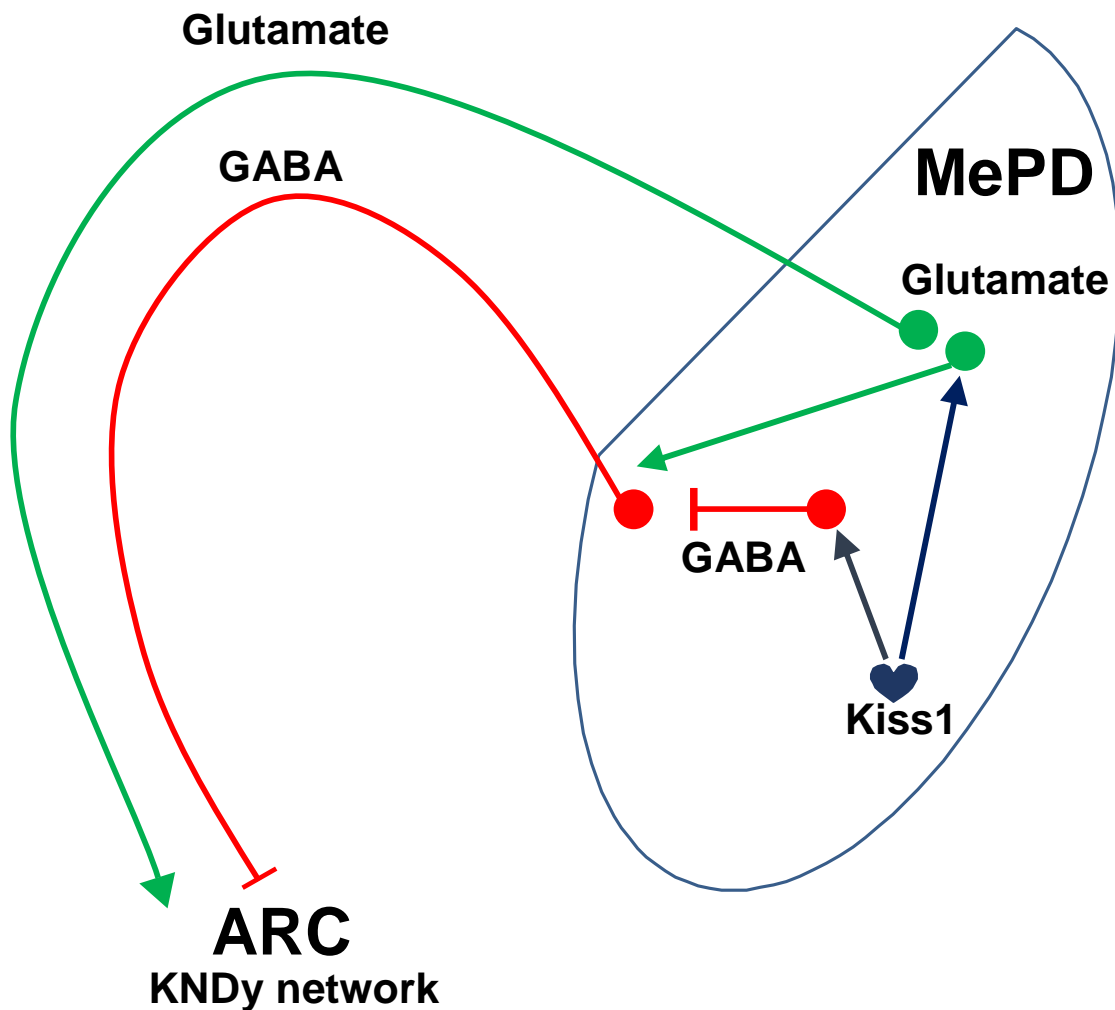

B

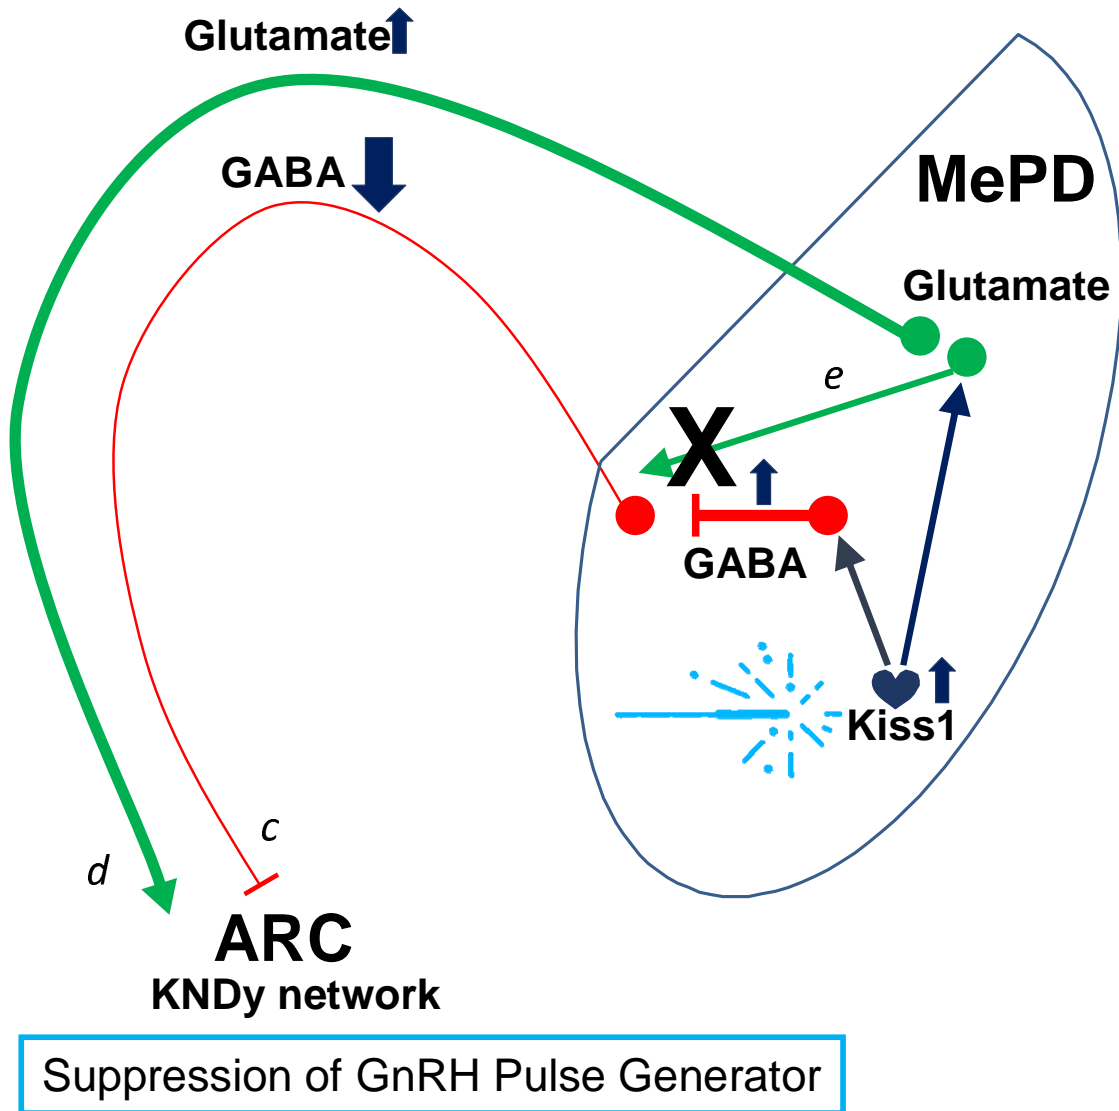

Source: https://www.biorxiv.org/content/10.1101/2021.11.27.470131v1.full.pdf
